# Supplementary material for: Diagnostic performance of angiography-derived quantitative flow ratio: A systematic review and meta-analysis
Source: Research Square preprint supplement (doi:10.21203/rs.3.rs-6395472/v1), 2025-06-03
Supplement: Supplementary file 1 [file 2022d46618ec4cff60c5cf63.docx]

# Supplementary material

**Table S1** Demographics and clinical symptoms of patients in the studies.

| Study | | No. of patients | Demographics | | |  | Clinical symptoms | | |
| --- | --- | --- | --- | --- | --- | --- | --- | --- | --- |
| Age, year | Male | BMI, kg/m2 |  | Chronic stable angina | Acute coronary syndrome | Other symptoms |
| **Mode=fQFR** | |  |  |  |  |  |  |  |  |
|  | Tu 2016 | 73 | 65.8 ± 8.9 | 61 (83.5) | 26.3 ± 6.3 |  | – | – | – |
|  | Rosendaelc 2017 | 17 | 64 ± 11 | 12 (71) | 27.7 ± 5.3 |  | – | – | – |
|  | Stähli 2018 | 436 | 71.5 (63.0–77.0) | 296 (67.9) | 26.0 (23.9–29.2) |  | 313 (71.8) | 123 (28.2) | 0 (0.0) |
|  | Kołtowski 2018 | 268 | 66.3 ± 9.98 | 193 (72) | – |  | 268 (100.0) | 0 (0.0) | 0 (0.0) |
|  | Emori, Prior MI (+) 2018 | 75 | 69 ± 9 | 62 (83) | – |  | – | – | – |
|  | Emori, Prior MI (–) 2018 | 75 | 70 ± 9 | 54 (72) | – |  | – | – | – |
|  | Erbay, G1 2019 | 225 | 71.0 (63.0–77.5) | 142 (63.1) | 26.2 (24.1–28.7) |  | 163 (72.4) | 62 (27.6) | 0 (0.0) |
|  | Erbay, G2 2019 | 221 | 72.0 (64.0–77.0) | 154 (73.0) | 26.0 (23.8–29.4) |  | 154 (73.0) | 57 (25.8) | 0 (0.0) |
|  | Santos 2022 | 69 | 64.55 ± 12.15 | 38 (55.1) | 27.8 ± 6.4 |  | 25 (36.3) | 21 (30.4) | 23 (33.3) |
|  | Wienemann 2022 | 544 | 69.5 (61.3–77.0) | 392 (72.06) | 27.7 ± 4.8 |  | 429 (78.9) | 114 (21.0) | 1 (0.2) |
|  | Echavarría‑Pinto 2022 | 66 | 66.1 ± 8.8 | 47 (71.2) | – |  | 37 (56.1) | 29 (43.9) | 0 (0.0) |
|  | Diemen 2023 | 166 | 63.1 ± 9.3 | 130 (78) | 27.3 ± 4.2 |  | – | – | – |
|  | Xiao 2024 | 168 | 58.50 ± 10.52 | 119 (70.8) | – |  | 0 (0.0) | 168 (100) | 0 (0.0) |
| **Mode=cQFR** | |  |  |  |  |  |  |  |  |
|  | Tu 2016 | 73 | 65.8 ± 8.9 | 61 (83.5) | 26.3 ± 6.3 |  | – | – | – |
|  | Xu 2017 | 308 | 61.3 ± 10.4 | 227 (73.7) | 25.2 ± 3.3 |  | 106 (34.4) | 202 (65.6) | 0 (0.0) |
|  | Yazaki 2017 | 142 | 72.5 ± 9.5 | 100 (70.4) | 23.9 ± 3.2 |  | 141 (99.3) | 1 (0.7) | 0 (0.0) |
|  | Rosendaelc 2017 | 17 | 64 ± 11 | 12 (71) | 27.7 ± 5.3 |  | – | – | – |
|  | Emori 2018 | 100 | 70 ± 10 | 71 (71) | – |  | – | – | – |
|  | Stähli 2018 | 436 | 71.5 (63.0–77.0) | 296 (67.9) | 26.0 (23.9–29.2) |  | 313 (71.8) | 123 (28.2) | 0 (0.0) |
|  | Spitaleri 2018 | 45 | 62 ± 11 | 36 (80) | 28 ± 5 |  | 0 (0.0) | 45 (100.0) | 0 (0.0) |
|  | Kołtowski 2018 | 268 | 66.3 ± 9.98 | 193 (72) | – |  | 268 (100.0) | 0 (0.0) | 0 (0.0) |
|  | Westra, T 2018 | 172 | 61 ± 8 | 116 (67) | 27 ± 4 |  | 53 (30.8) | 0 (0.0) | 119 (69.2) |
|  | Mejía-Rentería 2018 | 248 | 64.2 ± 10.3 | 188 (76) | 26.2 (24.6–29.0) |  | 174 (70.2) | 74 (29.8) | 0 (0.0) |
|  | Westra, A 2018 | 272 | 67 ± 10 | 196 (72) | 27 ± 5 |  | 258 (94.9) | 6 (2) | 8 (3) |
|  | Emori, Prior MI (+) 2018 | 75 | 69 ± 9 | 62 (83) | – |  | – | – | – |
|  | Emori, Prior MI (–) 2018 | 75 | 70 ± 9 | 54 (72) | – |  | – | – | – |
|  | Tanigaki 2019 | 152 | 69 ± 9 | 98 (64) | – |  | – | – | – |
|  | Erbay, G1 2019 | 225 | 71.0 (63.0–77.5) | 142 (63.1) | 26.2 (24.1–28.7) |  | 163 (72.4) | 62 (27.6) | 0 (0.0) |
|  | Erbay, G2 2019 | 221 | 72.0 (64.0–77.0) | 154 (73.0) | 26.0 (23.8–29.4) |  | 154 (73.0) | 57 (25.8) | 0 (0.0) |
|  | Kleczyński 2019 | 50 | 66.0 ± 9.3 | 36 (72) | – |  | 50 (100.0) | 0 (0.0) | 0 (0.0) |
|  | Smit, DM (+) 2019 | 66 | 67 ± 9 | 47 (71) | – |  | – | – | – |
|  | Smit, DM (–) 2019 | 193 | 67 ± 9 | 134 (69) | – |  | – | – | – |
|  | Kanno 2020 | 504 | 66.9 ± 9.4 | 88 (17.46) | – |  | – | – | – |
|  | Mehta 2020 | 47 | 65.1 ± 10.1 | 29 (61.7) | – |  | 47 (100.0) | 0 (0.0) | 0 (0.0) |
|  | Tebaldi 2020 | 116 | 70 (44–85) | 87 (75) | 30.4 (18.73–81.93) |  | 0 (0.0) | 116 (100.0) | 0 (0.0) |
|  | Diemen 2020 | 169 | 58 ± 9 | 101 (60) | 27.0 ± 3.6 |  | – | – | – |
|  | Gutiérrez-Chico 2020 | 59 | 63.4 ± 10.1 | 50 (84.75) | 28.1 (25.4–30.6) |  | 43 (72.9) | 16 (27.1) | 0 (0.0) |
|  | Kirigaya 2021 | 77 | 70 ± 9 | 62 (81) | – |  | 77 (100.0) | 0 (0.0) | 0 (0.0) |
|  | Kleczynski 2021 | 221 | 82.0 (74.0–88.0) | 91 (41.18) | 27.0 (23.9–30.0) |  | 221 (100.0) | 0 (0.0) | 0 (0.0) |
|  | Diemen 2021 | 115 | 64.9 ± 9.9 | 89 (77) | 26.7 ± 3.8 |  | 114 (99.1) | 1 (1) | 0 (0.0) |
|  | Xu 2022 | 48 | 61.89 ± 9.18 | 30 (62.50) | – |  | – | – | – |
|  | Zasada 2022 | 12 | 73.8 ± 7.5 | 6 (50) | – |  | – | – | – |
|  | Dowling 2022 | 35 | 75.5 ± 6.5 | 25 (71) | 28.7 ± 7.1 |  | – | – | – |
|  | Kawashima 2022 | 183 | 67.0 ± 8.9 | 159 (86.9) | 26.4 ± 3.6 |  | – | – | – |
|  | Wienemann 2022 | 544 | 69.5 (61.3–77.0) | 392 (72.06) | 27.7 ± 4.8 |  | 429 (78.9) | 114 (21.0) | 1 (0.2) |
|  | Echavarría‑Pinto 2022 | 66 | 66.1 ± 8.8 | 47 (71.2) | – |  | 37 (56.1) | 29 (43.9) | 0 (0.0) |
|  | Diemen 2023 | 166 | 63.1 ± 9.3 | 130 (78) | 27.3 ± 4.2 |  | – | – | – |
|  | Kasinadhuni 2023 | 53 | 62.4 ± 9.1 | 43 (81.1) | – |  | 34 (64.2) | 19 (35.8) | 0 (0.0) |
|  | Lopez-Palop 2023 | 81 | 70 ± 9.6 | 62 (76.5) | 28.0 ± 3.9 |  | 42 (51.9) | 39 (48.1) | 0 (0.0) |
|  | Xiao 2024 | 168 | 58.50±10.52 | 119(70.8) | – |  | 0 (0.0) | 168 (100) | 0 (0.0) |
|  | Yang 2024 | 78 | 61.5 ± 9.1 | 63 (80.8) | 25.7 ± 3.1 |  | 28 (35.9) | 50 (64.1) | 0 (0.0) |
|  | Winter 2024 | 129 | 73 ± 8 | 109 (84) | 28 ± 4 |  | 89 (69) | 40 (31) | 0 (0.0) |
| **Mode=aQFR** | |  |  |  |  |  |  |  |  |
|  | Tu 2016 | 73 | 65.8 ± 8.9 | 61(83.5) | 26.3 ± 6.3 |  | – | – | – |
|  | Rosendaelc 2017 | 17 | 64 ± 11 | 12(71) | 27.7 ± 5.3 |  | – | – | – |
| **Mode=uQFR** | |  |  |  |  |  |  |  |  |
|  | Tu 2021 | 306 | – | – | – |  | – | – | – |
|  | Guan 2022 | 54 | 72.3 ± 7.2 | 41 (75.9) | – |  | 49 (90.7) | 5 (9.3) | 0 (0.0) |
|  | Li 2022 | 167 | 62.4 ± 9.3 | 127 (76.0) | 25.4 ± 3.4 |  | 61 (36.5) | 77 | 29 (17.4) |
|  | Fezzi 2023 | 123 | 83.0 (78.3–86) | 57 (46.3) | 25.2 (22.8–27.5) |  | – | – | – |
|  | Kotoku, Distal LM 2023 | 300 | 66.8 ± 8.9 | 265 (88.9) | 26.9 ± 4.3 |  | – | – | – |
|  | Kotoku, pLAD 2023 | 300 | 66.8 ± 8.9 | 265 (88.9) | 26.9 ± 4.3 |  | – | – | – |
|  | Kotoku, pLCX 2023 | 300 | 66.8 ± 8.9 | 265 (88.9) | 26.9 ± 4.3 |  | – | – | – |
|  | Sun 2023 | 163 | 61.85 ± 8.77 | 122 (74.85) | – |  | – | – | – |
|  | Zuo, J, Men 2023 | 302 | 65.3 ± 10.3 | – | 24.9 ± 3.4 |  | 254 (84.1) | 48 (15.9) | 0 (0.0) |
|  | Zuo, J, Women 2023 | 158 | 68.1 ± 9.2 | – | 24.9 ± 3.8 |  | 141 (89.2) | 17 (10.8) | 0 (0.0) |
|  | Zuo, X, n 2023 | 461 | 65.7 ± 10.1 | 307 (66.6) | 25.2 ± 3.4 |  | 397 (86.1) | 64 (13.9) | 0 (0.0) |
|  | Zuo, X, m 2023 | 73 | 68.9 ± 8.8 | 52 (71.2) | 23.8 ± 3.3 |  | 64 (87.7) | 9 (12.3) | 0 (0.0) |
|  | Yang 2023 | 261 | 62.25 ± 9.40 | 190 (72.80) | – |  | – | – | – |
|  | Lai 2024 | 90 | 62.63 ± 9.22 | 63 (70) | – |  | – | – | – |
|  | Yuta, pre-TAVR 2024 | 25 | 85.8 ± 3.8 | 11 (44.0) | 21.5 ± 2.8 |  | – | – | – |
|  | Yuta, post-TAVR 2024 | 25 | 85.8 ± 3.8 | 11 (44.0) | 21.5 ± 2.8 |  | – | – | – |
| **Mode=non-specified QFR** | |  |  |  |  |  |  |  |  |
|  | Xi 2021 | 110 | 62.09 | 76 (69.1) | – |  | – | – | – |
|  | Gan 2021 | 52 | 62.8 ± 8.65 | 40 (76.9) | 24.65 ± 3.11 |  | – | – | – |
|  | Peper 2021 | 289 | 64.1 ± 10.4 | 211 (73.0) | 27.4 ± 4.1 |  | – | – | – |
|  | Zhang 2022 | 148 | 59.5 ± 9.7 | 101 (68.24) | 25.72 ± 3.09 |  | 96 (64.86) | 32 (21.62) | 20 (13.51) |
|  | Liu 2023 | 337 | 60.00 (52.00–67.00) | 228 (67.66) | 25.98 ± 3.44 |  | 20 (5.9) | 317 (94.1) | 0 (0.0) |
|  | Dong, DM, 2023 | 99 | 65.1 ± 8.9 | 63 (64) | 26.41 ± 2.8 |  | – | – | – |
|  | Dong, Non-DM, 2023 | 125 | 65.1 ± 9.4 | 75 (60) | 25.50 ± 3.0 |  | – | – | – |
|  | Yuasa 2023 | 67 | 66.94 ± 12.14 | 54 (80.1) | 26.29 ± 3.12 |  | 45 (67.2) | 22 (32.8) | 0 (0.0) |
|  | Zhang 2024 | 236 | 64.48 ± 9.63 | 160 (67.8) | – |  | – | 108 (45.76) | – |
|  | Han 2024 | 92 | 59.8 ± 9.2 | 56 (60.9) | 23.9 ± 3.1 |  | 77 (83.7) | 15 (16.3) | 0 (0.0) |
|  | Yuta 2024 | 25 | 85.8 ± 3.8 | 11 (44.0) | 21.5 ± 2.8 |  | – | – | – |
|  | Yuta 2024 | 25 | 85.8 ± 3.8 | 11 (44.0) | 21.5 ± 2.8 |  | – | – | – |

Values are n (%), mean ± standard deviation or median (interquartile range). BMI, body mass index. G1, Group 1 (Diameter≤2.8mm); G2, Group 2 (Diameter＞2.8mm); DM, diabetes mellitus; LM, left main; pLAD, proximal LAD 10 mm distal to the LM bifurcation point; Plcx, proximal LCX 10 mm distal to the LM bifurcation point; TAVR, transcatheter aortic valve replacement.

**Table S2** Cardiovascular risk factors and history of patients in the studies.

| Study | | Cardiovascular risk factors | | | | |  | Cardiovascular history | | |
| --- | --- | --- | --- | --- | --- | --- | --- | --- | --- | --- |
| Smoking | Hypertension | Dyslipidemia | Diabetes | Family history of CAD |  | Prior MI | Prior PCI | Prior CABG |
| **Mode=fQFR** | |  |  |  |  |  |  |  |  |  |
|  | Tu 2016 | – | 32 (43.8) | – | 17 (27.4) | – |  | 23 (31.5) | 28 (38.4) | 2 (2.7) |
|  | Rosendaelc 2017 | 3 (18) | 11 (65) | – | 1 (6) | 2 (12) |  | 1 (6) | 4 (24) | – |
|  | Stähli 2018 | 148 (34) | 383 (87.8) | 345 (79.1) | 98 (22.5) | 62 (14.2) |  | 143 (32.8) | 239 (54.8) | 11 (2.5) |
|  | Kołtowski 2018 | 28 (10.4) | 203 (75.7) | – | 75 (28) | 28 (10.4) |  | 128 (47.8) | 158 (59) | 7 (2.6) |
|  | Emori, Prior MI (+) 2018 | 17 (23) | 61 (81) | 45 (60) | 34 (45) | 13 (17) |  | – | – | – |
|  | Emori, Prior MI (–) 2018 | 23 (31) | 64 (85) | 46 (61) | 36 (48) | 12 (16) |  | – | – | – |
|  | Erbay, G1 2019 | – | 193 (85.8) | 176 (78.2) | 49 (21.8) | 38 (16.9) |  | – | 131 (58.2) | 5 (2.2) |
|  | Erbay, G2 2019 | – | 190 (90.0) | 169 (80.1) | 49 (23.2) | 24 (11.4) |  | – | 108 (51.2) | 6 (2.8) |
|  | Santos 2022 | 9 (13) | 49 (71) | 13 (19) | 15 (22) | 13 (19） |  | 11 (16) | – | – |
|  | Wienemann 2022 | 101 (18.6) | 398 (73.3) | 280 (51.6) | 146 (26.9) | 82 (15.1) |  | – | 264 (48.6) | – |
|  | Echavarría‑Pinto 2022 | 12 (18.7) | 55 (84.6) | – | 31 (47.7) | – |  | 22 (33.8) | 19 (29.2) | – |
|  | Diemen 2023 | 93 (56) | 105 (63) | – | 35 (21) | 86 (52) |  | 87 (52) | 157 (93) | – |
|  | Xiao 2024 | 100 (59.5) | – | – | – | 40 (23.8) |  | 8 (4.8) | – | – |
| **Mode=cQFR** | |  |  |  |  |  |  |  |  |  |
|  | Tu 2016 | – | 32 (43.8) | – | 17 (27.4) | – |  | 23 (31.5) | 28 (38.4) | 2 (2.7) |
|  | Xu 2017 | 87 (28.2) | 185 (60.1) | 139 (45.1) | 86 (27.9) | 51 (16.6) |  | 48 (15.6) | 65 (21.1) | 1 (0.3) |
|  | Yazaki 2017 | 33 (23.2) | 101 (71.1) | 88 (62.0) | 41 (28.9) | – |  | 30 (21.2) | 58 (40.8) | 2 (1.4) |
|  | Rosendaelc 2017 | 3 (18) | 11 (65) | – | 1 (6) | 2 (12) |  | 1 (6) | 4 (24) | – |
|  | Emori 2018 | 21 (21) | 73 (73) | 58 (58) | 48 (48) | – |  | 22 (22) | – | – |
|  | Stähli 2018 | 148 (34) | 383 (87.8) | 345 (79.1) | 98 (22.5) | 62 (14.2) |  | 143 (32.8) | 239 (54.8) | 11 (2.5) |
|  | Spitaleri 2018 | 19 (45) | 29 (64) | 23 (51) | 4 (9) | – |  | 2 (4) | 2 (4) | 0 (0) |
|  | Kołtowski 2018 | 28 (10.4) | 203 (75.7) | – | 75 (28) | 28 (10.4) |  | 128 (47.8) | 158 (59) | 7 (2.6) |
|  | Westra, T 2018 | 101(59) | 121 (70) | – | 18 (10) | 69 (40) |  | – | – | – |
|  | Mejía-Rentería 2018 | 56 (23) | 164 (66) | 143 (58) | 94 (38) | 46 (19) |  | – | – | – |
|  | Westra, A 2018 | 156 (57) | 201 (74) | 186 (68) | 78 (29) | 73 (27) |  | – | 109 (40) | 11(4) |
|  | Emori, Prior MI (+) 2018 | 17 (23) | 61 (81) | 45 (60) | 34 (45) | 13 (17) |  | – | – | – |
|  | Emori, Prior MI (–) 2018 | 23 (31) | 64 (85) | 46 (61) | 36 (48) | 12 (16) |  | – | – | – |
|  | Tanigaki 2019 | 59 (39) | 99 (65) | 80 (53) | 46 (30) | – |  | – | – | – |
|  | Erbay, G1 2019 | – | 193 (85.8) | 176 (78.2) | 49 (21.8) | 38 (16.9) |  | – | 131 (58.2) | 5 (2.2) |
|  | Erbay, G2 2019 | – | 190 (90.0) | 169 (80.1) | 49 (23.2) | 24 (11.4) |  | – | 108 (51.2) | 6 (2.8) |
|  | Kleczyński 2019 | – | – | – | – | – |  | – | – | – |
|  | Smit, DM (+) 2019 | – | 60 (91) | – | 66 (100.0) | – |  | 11 (17) | 29 (44) | 3 (5) |
|  | Smit, DM (–) 2019 | – | 130 (68) | – | 0 (0.0) | – |  | 30 (16) | 54 (28) | 3 (2) |
|  | Kanno 2020 | 116 (23.0) | 352 (69.8) | 316 (62.7) | 210 (41.7) | – |  | – | – | – |
|  | Mehta 2020 | 22 (46.8) | 27 (57.4) | – | 11 (23.4) | – |  | 7 (14.9) | 10 (21.3) | – |
|  | Tebaldi 2020 | 34 (29) | 89 (77) | 66 (57) | 31 (27) | – |  | 22 (19) | 21 (18) | – |
|  | Diemen 2020 | 79 (47) | 83 (49) | – | 29 (17) | 86 (51) |  | – | – | – |
|  | Gutiérrez-Chico 2020 | 17 (28.8) | 40 (67.8) | 31 (52.5) | 23 (39.0) | 6 (10.2) |  | 28 (47.5) | 40 (67.8) | 2 (3.4) |
|  | Kirigaya 2021 | 13 (17) | 46 (60) | 43 (56) | 34 (44) | 26 (34) |  | 16 (21) | 17 (22) | – |
|  | Kleczynski 2021 | 71 (32.1) | 197 (89.1) | 121 (100.0) | 68 (30.8) | – |  | 73 (33.0) | 70 (31.7) | – |
|  | Diemen 2021 | 69 (60) | 61 (53) | – | 18 (16) | 49 (44) |  | 29 (25) | 55 (48) | – |
|  | Xu 2022 | 17 (35.42) | 32 (66.67) | 5 (10.42) | 12 (25.00) | 3 (6.25) |  | – | 11 (22.92) | – |
|  | Zasada 2022 | – | – | – | – | – |  | – | – | – |
|  | Dowling 2022 | 16 (46) | 24 (69) | 23 (66) | 20 (57) | – |  | 4 (11) | – | – |
|  | Kawashima 2022 | 122 (63.2) | 133 (72.7) | 121 (66.1) | 66 (36.0) | – |  | 2 (1.1) | – | 0 (0) |
|  | Wienemann 2022 | 101 (18.6) | 398 (73.3) | 280 (51.6) | 146 (26.9) | 82 (15.1) |  | – | 264 (48.6) | – |
|  | Echavarría‑Pinto 2022 | 12 (18.7) | 55 (84.6) | – | 31 (47.7) | – |  | 22 (33.8) | 19 (29.2) | – |
|  | Diemen 2023 | 93 (56) | 105 (63) | – | 35 (21) | 86 (52) |  | 87 (52) | 157 (93) | – |
|  | Kasinadhuni 2023 | 8 (15.1) | 36 (67.9) | 12 (22.6) | 21 (39.6) | – |  | – | – | – |
|  | Lopez-Palop 2023 | 42 (51.9) | 58 (71.6) | 55 (67.9) | 31 (38.3) | – |  | 18 (22.2) | – | – |
|  | Xiao 2024 | 100 (59.5) | – | – | – | 40 (23.8) |  | 8 (4.8) | – | – |
|  | Yang 2024 | 40 (51.3) | 53 (67.9) | 71 (91.0) | 31 (39.7) | 20 (25.6) |  | 5 (6.4) | 19 (24.3) | – |
|  | Winter 2024 | 17 (13) | 91 (71) | – | 52 (40) | 85 (66) |  | 65 (50) | 74 (57) | – |
| **Mode=aQFR** | |  |  |  |  |  |  |  |  |  |
|  | Tu 2016 | – | 32 (43.8) | – | 17 (27.4) | – |  | 23 (31.5) | 28 (38.4) | 2 (2.7) |
|  | Rosendaelc 2017 | 3 (18) | 11 (65) | – | 1 (6) | 2 (12) |  | 1 (6) | 4 (24) | – |
| **Mode=uQFR** | |  |  |  |  |  |  |  |  |  |
|  | Tu 2021 | – | – | – | – | – |  | – | – | – |
|  | Guan 2022 | 9 (16.7) | 40 (74.0) | 29 (53.7) | 10 (18.5) | – |  | 4 (7.4) | 5 (9.3) | – |
|  | Li 2022 | 71 (42.5) | 99 (59.3) | 86 (51.5) | 49 (29.3) | – |  | – | – | – |
|  | Fezzi 2023 | – | 102 (82.9) | 61 (50.0) | 38 (30.9) | – |  | 10 (8.1) | – | – |
|  | Kotoku, Distal LM 2023 | 59 (20.1) | 230 (77.2) | 207 (70.6) | 97 (32.6) | 88 (33.1) |  | 10 (3.4) | – | – |
|  | Kotoku, pLAD 2023 | 59 (20.1) | 230 (77.2) | 207 (70.6) | 97 (32.6) | 88 (33.1) |  | 10 (3.4) | – | – |
|  | Kotoku, pLCX 2023 | 59 (20.1) | 230 (77.2) | 207 (70.6) | 97 (32.6) | 88 (33.1) |  | 10 (3.4) | – | – |
|  | Sun 2023 | 46 (28.22) | 91 (55.83) | 24 (14.72) | 47 (28.83) | 4 (2.45) |  | 13 (7.98) | 33 (20.25) | 3 (1.84) |
|  | Zuo, J, Men 2023 | 147 (48.7) | 219 (72.5) | 161 (53.3) | 92 (30.5) | – |  | 33 (10.9) | 90 (29.8) | – |
|  | Zuo, J, Women 2023 | 4 (2.5) | 126 (79.7) | 53 (33.5) | 42 (26.6) | – |  | 7 (4.4) | 2 (15.8) | – |
|  | Zuo, X, n 2023 | 150 (32.5) | 345 (74.8) | 218 (47.3) | 131 (28.4) | – |  | 39 (8.5) | 110 (23.9) | – |
|  | Zuo, X, m 2023 | 26 (35.6) | 57 (78.1) | 35 (47.9) | 19 (26.0) | – |  | 7 (9.6) | 23 (31.5) | – |
|  | Yang 2023 | 72 (27.59) | 150 (57.47) | 31 (11.88) | 74 (28.35) | 6 (2.30) |  | 4 (1.53) | 52 (19.92) | 2 (0.77) |
|  | Lai 2024 | 24 (26.67) | 57 (63.33) | 9 (10.00) | 24 (26.67) | 3 (3.33) |  | 3 (3.33) | 17 (18.89) | 1 (1.11) |
|  | Yuta, pre-TAVR 2024 | 3 (12.0) | 22 (88.0) | 13 (52.0) | 8 (32.0) | – |  | – | – | – |
|  | Yuta, post-TAVR 2024 | 3 (12.0) | 22 (88.0) | 13 (52.0) | 8 (32.0) | – |  | – | – | – |
| **Mode=non-specified QFR** | |  |  |  |  |  |  |  |  |  |
|  | Xi 2021 | 24 (21.8) | 44 (40.0) | – | 38 (34.5) | 3 (2.7) |  | – | – | – |
|  | Gan 2021 | 11 (21.2) | 35 (67.3) | 6 (11.5) | 13 (25.0) | 1 (1.92) |  | 1 (1.92) | 12 (23.1) | 2 (3.8) |
|  | Peper 2021 | 136 (47.1) | 213 (73.7) | – | 53 (18.3) | 151 (53.0) |  | – | 45 (15.6) | – |
|  | Zhang 2022 | 43 (29.05) | 98 (66.22) | 99 (66.89) | 43 (29.05) | 16 (16.15) |  | – | – | – |
|  | Liu 2023 | 148 (43.92) | 224 (66.47) | 161 (47.77) | 123 (36.50) | – |  | 36 (10.6) | 79 (23.44) | – |
|  | Dong, DM, 2023 | 50 (51) | 80 (81) | 65 (66) | 99 (100.0) | 26 (26) |  | 7 (7) | 21 (21) | 0 (0) |
|  | Dong, Non-DM, 2023 | 59 (47) | 87 (70) | 62 (50) | 0 (0) | 34 (27) |  | 8 (6) | 18 (14) | 1 (1) |
|  | Yuasa 2023 | 39 (58.2) | 51 (76.1) | – | 21 (31.3) | – |  | 20 (29.9) | – | – |
|  | Zhang 2024 | 79 (33.47) | 130 (55.08) | 78 (33.05) | 76 (32.20) | – |  | – | – | – |
|  | Han 2024 | 28 (30.4) | 45 (48.9) | 24 (26.1) | 30 (32.6) | – |  | – | – | – |
|  | Yuta 2024 | 3 (12.0) | 22 (88.0) | 13 (52.0) | 8 (32.0) | – |  | – | – | – |
|  | Yuta 2024 | 3 (12.0) | 22 (88.0) | 13 (52.0) | 8 (32.0) | – |  | – | – | – |

Values are n (%), mean ± standard deviation or median (interquartile range). CAD, coronary artery disease; PCI, percutaneous coronary intervention; CABG, coronary artery bypass grafting. Other abbreviations are as in Supplement 1.

**Table S3** Target vessel characteristics in the studies.

| Study | | No. of vessels | Target vessel, n (%) | | | | | |  | Quantitative coronary angiography analysis | | | |
| --- | --- | --- | --- | --- | --- | --- | --- | --- | --- | --- | --- | --- | --- |
| LAD | D | LCx | OM | RCA | Other |  | MLD, mm | RVD, mm | %DS, % | LL, mm |
| **Mode=fQFR** | |  |  |  |  |  |  |  |  |  |  |  |  |
|  | Tu 2016 | 84 | 46 (54.8) | 1 (1.2) | 12 (14.3) | 5 (6.0) | 19 (22.6) | 1 (1.2) |  | 1.52 ± 0.36 | 2.84 (2.57–3.06) | 46.1 ± 8.9 | – |
|  | Rosendaelc 2017 | 15 | 12 (80) | 0 (0.0) | 3 (20) | 0 (0.0) | 0 (0.0) | 0 (0.0) |  | – | – | 38.7 ± 8.6 | 15.4 ± 7.7 |
|  | Stähli 2018 | 516 | 287 (55.6) | 15 (2.9) | 67 (13.0) | 23 (4.5) | 119 (23.1) | 5 (1.0) |  | 1.7 (1.4–1.9) | 2.8 (2.5–3.2) | 41 (36–46) | 17.2 (12.0–24.9) |
|  | Kołtowski 2018 | 306 | 174 (56.9) | 220 (71.9) | 31 (10.1) | 13 (4.2) | 81 (26.5) | 4 (1.3) |  | – | – | 51.3 ± 10.2 | – |
|  | Emori, Prior MI (+) 2018 | 75 | 48 (64) | 0 (0.0) | 5 (7) | 0 (0.0) | 22 (29) | 0 (0.0) |  | 1.27 ± 0.06 | 2.71 ± 0.06 | 53 ± 14 | 20.2 ± 9.6 |
|  | Emori, Prior MI (–) 2018 | 75 | 49 (65) | 0 (0.0) | 12 (16) | 0 (0.0) | 14 (19) | 0 (0.0) |  | 1.30 ± 0.06 | 2.79 ± 0.06 | 54 ± 14 | 20.2 ± 9.9 |
|  | Erbay, G1 2019 | 270 | 157 (58.1) | 12 (4.5) | 44 (16.3) | 17 (6.3) | 35 (13.0) | 5 (1.8) |  | 1.4 (1.3–1.6) | 2.5 (2.3–2.7) | 41.4 (36.4–47.6) | 17.0 (11.7–24.0) |
|  | Erbay, G2 2019 | 246 | 130 (52.8) | 3 (1.2) | 23 (9.4) | 6 (2.5) | 84 (34.1) | 0 (0.0) |  | 1.9 (1.7–2.1) | 3.3 (3.0–3.6) | 41.4 (36.4–45.7) | 17.2 (12.1–25.9) |
|  | Santos 2022 | 75 | 43 (57.4) | 2 (2.7) | 6 (8) | 1 (1.3) | 22 (29.3) | 1 (1.3) |  | 1.31 ± 0.32 | 2.43 ± 0.49 | 46.2 ± 7.4 | 18.95 ± 12.97 |
|  | Wienemann 2022 | 626 | 385 (61.5) | 0 (0.0) | 103 (16.5) | 0 (0.0) | 126 (20.1) | 12 (1.9) |  | 1.5 (1.3–1.8) | – | 44.5 ± 7.5 | 18.5 (12.3–26.1) |
|  | Echavarría‑Pinto 2022 | 90 | 48 (53.3) | 2 (2.2) | 19 (21.1) | 4 (4.4) | 13 (14.4) | 4 (4.4) |  | 1.5 ± 0.5 | 2.9 ± 0.6 | 46.6 ± 12.8 | 17.2 (10.9–30.5) |
|  | Diemen 2023 | 334 | 127 (38) | 0 (0.0) | 114 (34) | 0 (0.0) | 93 (28) | 0 (0.0) |  | 1.7 ± 0.5 | – | 41 ± 14 | 16.3 (10.5–26.2) |
|  | Xiao 2024 | 246 | 169 (68.7) | 0 (0.0) | 35 (14.2) | 0 (0.0) | 42 (17.1) | 0 (0.0) |  | – | – | – | – |
| **Mode=cQFR** | |  |  |  |  |  |  |  |  |  |  |  |  |
|  | Tu 2016 | 84 | 46 (54.8) | 1 (1.2) | 12 (14.3) | 5 (6.0) | 19 (22.6) | 1 (1.2) |  | 1.52 ± 0.36 | 2.84 (2.57–3.06) | 46.1 ± 8.9 | – |
|  | Xu 2017 | 332 | 185 (55.7) | 2 (0.6) | 49 (14.8) | 5 (1.5) | 87 (26.2) | 4 (1.2) |  | 1.51 ± 0.44 | 2.82 ± 0.56 | 46.5 ± 11.3 | 13.1 ± 6.4 |
|  | Yazaki 2017 | 151 | 96 (63.6) | 2 (1.3) | 25 (16.6) | 0 (0.0) | 26 (17.2) | 2 (1.3) |  | 1.38 ± 0.39 | 2.84 ± 0.57 | 48.8 ± 8.2 | 16.8 (12.1–24.6) |
|  | Rosendaelc 2017 | 15 | 12 (80) | 0 (0.0) | 3 (20) | 0 (0.0) | 0 (0.0) | 0 (0.0) |  | – | – | 38.7 ± 8.6 | 15.4 ± 7.7 |
|  | Emori 2018 | 100 | 63 (63) | 0 (0.0) | 23 (23) | 0 (0.0) | 14 (14) | 0 (0.0) |  | 1.19 ± 0.39 | 2.62 ± 0.55 | 55 ± 10 | 22.6 ± 12.4 |
|  | Stähli 2018 | 516 | 287 (55.6) | 15 (2.9) | 67 (13.0) | 23 (4.5) | 119 (23.1) | 5 (1.0) |  | 1.7 (1.4–1.9) | 2.8 (2.5–3.2) | 41 (36–46) | 17.2 (12.0–24.9) |
|  | Spitaleri 2018 | 49 | – | – | – | – | – | – |  | – | 3 ± 0.4 | 66 ± 10 | – |
|  | Kołtowski 2018 | 306 | 174 (56.9) | 220 (71.9) | 31 (10.1) | 13 (4.2) | 81 (26.5) | 4 (1.3) |  | – | – | 51.3 ± 10.2 | – |
|  | Westra, T 2018 | 255 | 129 (51) | 17 (7) | 29 (11) | 23 (9) | 46 (18) | 11 (4) |  | – | – | – | – |
|  | Mejía-Rentería 2018 | 300 | 177 (59.0) | 13 (4.3) | 37 (12.3) | 18 (6.0) | 49 (16.3) | 6 (2.0) |  | 1.30 (1.00–1.60) | 2.80 ± 0.57 | 52 ± 12 | 75.9 ± 22.4 |
|  | Westra, A 2018 | 317 | 160 (50) | 5 (1) | 50 (16) | 23 (7) | 68 (22) | 11 (3) |  | 1.57 (1.27–1.90) | 2.82 (2.44–3.20) | 45 ± 10 | 9.64 (7.53–13.76) |
|  | Emori, Prior MI (+) 2018 | 75 | 48 (64) | 0 (0.0) | 5 (7) | 0 (0.0) | 22 (29) | 0 (0.0) |  | 1.27 ± 0.06 | 2.71 ± 0.06 | 53 ± 14 | 20.2 ± 9.6 |
|  | Emori, Prior MI (–) 2018 | 75 | 49 (65) | 0 (0.0) | 12 (16) | 0 (0.0) | 14 (19) | 0 (0.0) |  | 1.30 ± 0.06 | 2.79 ± 0.06 | 54 ± 14 | 20.2 ± 9.9 |
|  | Tanigaki 2019 | 233 | 132 (56) | 0 (0.0) | 53 (23) | 0 (0.0) | 48 (21) | 0 (0.0) |  | 1.38 ± 0.46 | 2.87 ± 0.65 | 49 ± 13 | 20.4 ± 9.8 |
|  | Erbay, G1 2019 | 270 | 157 (58.1) | 12 (4.5) | 44 (16.3) | 17 (6.3) | 35 (13.0) | 5 (1.8) |  | 1.4 (1.3–1.6) | 2.5 (2.3–2.7) | 41.4 (36.4–47.6) | 17.0 (11.7–24.0) |
|  | Erbay, G2 2019 | 246 | 130 (52.8) | 3 (1.2) | 23 (9.4) | 6 (2.5) | 84 (34.1) | 0 (0.0) |  | 1.9 (1.7–2.1) | 3.3 (3.0–3.6) | 41.4 (36.4–45.7) | 17.2 (12.1–25.9) |
|  | Kleczyński 2019 | 123 | 48 (39.0) | – | – | – | – | 75 (61.0) | | – | – | 44.2 ± 11.7 | – |
|  | Smit, DM (+) 2019 | 82 | 55 (67) | 0 (0.0) | 13 (16) | 0 (0.0) | 9 (11) | 5 (6) |  | 1.6 ± 0.3 | – | 42.7 ± 8.9 | 20.8 (11.9–31.8) |
|  | Smit, DM (–) 2019 | 238 | 161 (68) | 0 (0.0) | 33 (14) | 0 (0.0) | 24 (10) | 20 (8) |  | 1.6 ± 0.3 | – | 43.3 ± 8.5 | 20.0 (12.7–28.6) |
|  | Kanno 2020 | 504 | 348 (69.0) | 0 (0.0) | 56 (11.1) | 0 (0.0) | 100 (19.8) | 0 (0.0) |  | 1.4 (1.1–1.7) | 2.8 (2.5–3.1) | 49.6 ± 12.0 | 18.4 (13.1–24.0) |
|  | Mehta 2020 | 85 | 38 (44.7) | 0 (0.0) | 15 (17.6) | 10 (11.8) | 17 (20.0) | 5 (5.9) |  | – | – | 35.3 ± 14.7 | 11.9 ± 10.2 |
|  | Tebaldi 2020 | 184 | 100 (54) | 0 (0.0) | 44 (24) | 0 (0.0) | 40 (22) | 0 (0.0) |  | – | 2.7 (2.5–3.4) | 62 (55–75) | 21 (13–25) |
|  | Diemen 2020 | 286 | 122 (43) | 3 (1) | 58 (20) | 12 (4) | 77 (27) | 14 (4.9) |  | 1.7 ± 0.6 | – | 37 ± 16 | 18 ± 13 |
|  | Gutiérrez-Chico 2020 | 75 | 39 (52.0) | 5 (6.7) | 4 (5.3) | 2 (2.7) | 23 (30.7) | 2 (2.7) |  | – | – | – | – |
|  | Kirigaya 2021 | 95 | 61 (64) | 0 (0.0) | 17 (18) | 0 (0.0) | 17 (18) | 0 (0.0) |  | 1.42 ± 0.38 | 2.82 ± 0.61 | 49.2 ± 8.6 | 20.3 ± 10.8 |
|  | Kleczynski 2021 | 416 | 190 (45.7) | 19 (4.6) | 64 (15.4) | 23 (5.5) | 88 (21.2) | 32 (7.7) |  | 1.5 ± 0.5 | 3.4 ± 0.6 | 58.6 ± 13.4 | 18.5 ± 9.9 |
|  | Diemen 2021 | 134 | 70 (52) | 2 (1) | 14 (10) | 8 (6) | 33 (25) | 7 (5.2) |  | 0.98 ± 0.36 | – | 64 ± 12 | – |
|  | Xu 2022 | 48 | 26 (54.17) | 0 (0.0) | 5 (10.42) | 0 (0.0) | 17 (35.42) | 0 (0.0) |  | – | – | 47.2 ± 11.2 | – |
|  | Zasada 2022 | 13 | 12 (92) | 0 (0.0) | 1 (7.7) | 0 (0.0) | 0 (0.0) | 0 (0.0) |  | – | – | – | – |
|  | Dowling 2022 | 57 | 31 (54) | 5 (9) | 5 (9) | 9 (16) | 3 (5) | 4 (7) |  | – | – | – | – |
|  | Kawashima 2022 | 469 | 190 (40.5) | 0 (0.0) | 143 (30.5) | 0 (0.0) | 136 (29.0) | 0 (0.0) |  | – | 2.75 ± 0.64 | – | – |
|  | Wienemann 2022 | 626 | 385 (61.5) | 0 (0.0) | 103 (16.5) | 0 (0.0) | 126 (20.1) | 12 (1.9) |  | 1.5 (1.3–1.8) | – | 44.5 ± 7.5 | 18.5 (12.3–26.1) |
|  | Echavarría‑Pinto 2022 | 90 | 48 (53.3) | 2 (2.2) | 19 (21.1) | 4 (4.4) | 13 (14.4) | – |  | 1.5 ± 0.5 | 2.9 ± 0.6 | 46.6 ± 12.8 | 17.2 (10.9–30.5) |
|  | Diemen 2023 | 334 | 127 (38) | 0 (0.0) | 114 (34) | 0 (0.0) | 93 (28) | 0 (0.0) |  | 1.7 ± 0.5 | – | 41 ± 14 | 16.3 (10.5–26.2) |
|  | Kasinadhuni 2023 | 56 | 28 (50) | 0 (0.0) | 15 (26.8) | 0 (0.0) | 12 (21.5) | 1 (1.7) |  | 1.35 ± 0.33 | 3.2 ± 0.37 | 45.25 ± 11.22 | 20.8 ± 12.4 |
|  | Lopez-Palop 2023 | 107 | 82 (76.6) | 0 (0.0) | 25 (23.4) | 0 (0.0) | 0 (0.0) | 0 (0.0) |  | 1.86 ± 0.40 | 3.59 ± 1.67 | 45.88 ± 8.80 | 13.35 ± 6.92 |
|  | Xiao 2024 | 246 | 169 (68.7) | 0 (0.0) | 35 (14.2) | 0 (0.0) | 42 (17.1) | 0 (0.0) |  | – | – | – | – |
|  | Yang 2024 | 98 | 67 (68.4) | 0 (0.0) | 22 (22.4) | 0 (0.0) | 3 (3.1) | 6 (6.1) |  | 1.82 ± 0.34 | 3.85 ± 0.65 | 52.1 ± 8.5 | 20.12 ± 14.33 |
|  | Winter 2024 | 140 | 43 (31) | – | 89 (64) | – | 64 (46) | – |  | 1.77 ± 0.70 | 3.04 ± 0.71 | 42.26 ± 15.56 | 10.59 (6.41–17.61) |
| **Mode=aQFR** | |  |  |  |  |  |  |  |  |  |  |  |  |
|  | Tu 2016 | 84 | 46 (54.8) | 1 (1.2) | 12 (14.3) | 5 (6.0) | 19 (22.6) | 1 (1.2) |  | 1.52 ± 0.36 | 2.84 (2.57–3.06) | 46.1 ± 8.9 | – |
|  | Rosendaelc 2017 | 15 | 12 (80) | 0 (0.0) | 3 (20) | 0 (0.0) | 0 (0.0) | 0 (0.0) |  | – | – | 38.7 ± 8.6 | 15.4 ± 7.7 |
| **Mode=uQFR** | |  |  |  |  |  |  |  |  |  |  |  |  |
|  | Tu 2021 | 330 | – | – | – | – | – | – |  | – | – | – | – |
|  | Guan 2022 | 61 | 41 (67.2) | 0 (0.0) | 9 (14.8) | 0 (0.0) | 11 (18.0) | 0 (0.0) |  | – | – | – | – |
|  | Li 2022 | 191 | 131 (68.6) | 7 (3.7) | 24 (12.6) | 2 (1.0) | 27 (14.1) | 0 (0.0) |  | 1.60 ± 0.40 | – | 40.2 ± 8.2 | – |
|  | Fezzi 2023 | 198 | 116 (58.6) | – | – | – | 38 (19.2) | – |  | 1.69 ± 0.69 | 2.80 ± 0.57 | 42.9 ± 16.4 | 14.8 ± 7.0 |
|  | Kotoku, Distal LM 2023 | 300 | – | – | – | – | – | – |  | – | 4.06 ± 0.82 | – | – |
|  | Kotoku, pLAD 2023 | 300 | – | – | – | – | – | – |  | – | 2.78 ± 0.71 | – | – |
|  | Kotoku, pLCX 2023 | 300 | – | – | – | – | – | – |  | – | 2.63 ± 0.62 | – | – |
|  | Sun 2023 | 178 | 123 (69.10) | 2 (1.12) | 24 (13.48) | 0 (0.0) | 29 (16.29) | 0 (0.0) |  | – | 3.14 ± 0.70 | 47.38 ± 12.30 | – |
|  | Zuo, J, Men 2023 | 329 | 220 (66.9) | 0 (0.0) | 56 (17.0) | 0 (0.0) | 53 (16.1) | 0 (0.0) |  | 1.80 (1.54–2.16) | 3.0 (2.6–3.5) | 39.4 ± 8.1 | 21.6 (11.8–33.1) |
|  | Zuo, J, Women 2023 | 168 | 115 (68.5) | 0 (0.0) | 23 (13.7) | 0 (0.0) | 30 (17.9) | 0 (0.0) |  | 1.87 (1.57–2.19) | 2.9 (2.5–3.4) | 36.4 ± 8.2 | 18.3 (11.6–27.3) |
|  | Zuo, X, n 2023 | 496 | 331 (66.7) | 0 (0.0) | 84 (16.9) | 0 (0.0) | 81 (16.3) | 0 (0.0) |  | 1.81 (1.54–2.17) | – | 37.8 ± 8.4 | 19.3 (11.7–30.2) |
|  | Zuo, X, m 2023 | 75 | 56 (74.7) | 0 (0.0) | 7 (9.3) | 0 (0.0) | 12 (16.0) | 0 (0.0) |  | 1.77 (1.52–2.10) | – | 39.8 ± 7.3 | 24.9 (16.7–34.4) |
|  | Yang 2023 | 286 | 194 (67.83) | 2 (0.70) | 40 (13.99) | 1 (0.35) | 49 (17.13) | 0 (0.0) |  | – | 3.19 ± 0.70 | 47.31 ± 12.21 | – |
|  | Lai 2024 | 90 | 58 (64.44) | 0 (0.0) | 12 (13.33) | 0 (0.0) | 20 (22.22) | 0 (0.0) |  | – | 3.25 ± 0.78 | 50.08 ± 8.95 | – |
|  | Yuta, pre-TAVR 2024 | 38 | 21 (55.3) | 0 (0.0) | 10 (26.3) | 0 (0.0) | 7 (18.4) | 0 (0.0) |  | 1.82 ± 0.60 | – | 33.8 ± 13.0 | 11.8 ± 6.8 |
|  | Yuta, post-TAVR 2024 | 38 | 21 (55.3) | 0 (0.0) | 10 (26.3) | 0 (0.0) | 7 (18.4) | 0 (0.0) |  | 1.96 ± 0.70 | – | 31.3 ± 13.6 | 11.2 ± 7.1 |
| **Mode=non-specified QFR** | |  |  |  |  |  |  |  |  |  |  |  |  |
|  | Xi 2021 | 110 | – | – | – | – | – | – |  | – | – | – | – |
|  | Gan 2021 | 52 | 35 (67.3) | 0 (0.0) | 8 (15.4) | 0 (0.0) | 9 (17.3) | 0 (0.0) |  | – | 3.20 ± 0.62 | 48.97 ± 10.15 | – |
|  | Peper 2021 | 381 | 117 (30.7) | 13 (3.4) | 35 (9.2) | 0 (0.0) | 195 (51.2) | 21 (5.5) |  | 1.35 ± 0.38 | 2.63 (0.57) | 48.5 ± 9.4 | 20.3 (12.7–24.1) |
|  | Zhang 2022 | 175 | 119 (68) | 0 (0.0) | 29 (16.57) | 0 (0.0) | 27 (15.43) | 0 (0.0) |  | 1.37 ± 0.46 | 2.66 ± 0.60 | 48.29 ± 13.2 | 10.52 ± 4.55 |
|  | Liu 2023 | 337 | 264 (78.34) | 0 (0.0) | 23 (6.82) | 0 (0.0) | 50 (14.84) | 0 (0.0) |  | 1.60 (1.39–1.84) | 2.80 (2.50–3.20) | 43.00 (37.00–49.00) | 26.90 (16.15–39.75) |
|  | Dong, DM, 2023 | 142 | 75 (53) | 0 (0.0) | 21 (15) | 0 (0.0) | 29 (20) | 17 (12) |  | 1.4 (1.1–1.6) | – | 44 ± 9 | 26.0 (16.1–38.3) |
|  | Dong, Non-DM, 2023 | 175 | 105 (60) | 0 (0.0) | 27 (15) | 0 (0.0) | 29 (17) | 14 (8) |  | 1.5 (1.2–1.7) | – | 45 ± 10 | 26.4 (16.9–39.9) |
|  | Yuasa 2023 | 73 | 64 (87.7) | 1 (1.4) | 7 (9.6) | 1 (1.4) | 0 (0.0) | 0 (0.0) |  | 1.82 ± 0.39 | 3.38 ± 0.88 | 43.81 ± 10.84 | – |
|  | Zhang 2024 | 236 | 186 (78.81) | 0 (0.0) | 13 (5.51) | 0 (0.0) | 37 (15.68) | 0 (0.0) |  | – | – | – | – |
|  | Han 2024 | 103 | 54 (52.4) | 0 (0.0) | 13 (12.6) | 0 (0.0) | 36 (35.0) | 0 (0.0) |  | – | – | – | – |
|  | Yuta 2024 | 38 | 21 (55.3) | 0 (0.0) | 10 (26.3) | 0 (0.0) | 7 (18.4) | 0 (0.0) |  | 1.82 ± 0.60 | – | 33.8 ± 13.0 | 11.8 ± 6.8 |
|  | Yuta 2024 | 38 | 21 (55.3) | 0 (0.0) | 10 (26.3) | 0 (0.0) | 7 (18.4) | 0 (0.0) |  | 1.96 ± 0.70 | – | 31.3 ± 13.6 | 11.2 ± 7.1 |

Values are n (%), mean ± standard deviation or median (interquartile range). LAD, left descending artery; D, diagonal; LCx, left circumflex; OM, obtuse marginal; RCA, right coronary artery; MLD, minimum lumen diameter; RVD, reference vessel diameter; DS, diameter stenosis; LL, lesion length. Other abbreviations are as in Supplement 1.

**Table S4** Individual study estimates of per-vessel diagnostic accuracy of QFR.

| Study | | Accuracy, % | Sensitivity, % | Specificity, % | PPV, % | NPV, % | LR+ | LR− | AUC |
| --- | --- | --- | --- | --- | --- | --- | --- | --- | --- |
| **Mode=fQFR** | |  |  |  |  |  |  |  |  |
|  | Tu 2016 | 80 (71–89) | 67 (46–84) | 86 (74–94) | 69 (48–86) | 85 (73–93) | 4.8 (2.4–9.5) | 0.4 (0.2–0.7) | 0.88 (0.79–0.94) |
|  | Rosendaelc 2017 | 86.67 | 100.00 | 84.62 | 50.00 | 100.00 | 6.50 | 0.00 | – |
|  | Stähli 2018 | 91.9 (89.2–94.1) | 72.0 (62.1–80.5) | 96.6 (94.4–98.2) | 83.7 (75.2–89.7) | 93.5 (91.3–95.2) | 21.4 (12.6–36.3) | 0.29 (0.21–0.40) | 0.84 (0.81–0.87) |
|  | Kołtowski 2018 | 74.5 (68.7–78.1) | 89.5 | 63.4 | 64.4 | 89.1 | 2.4 | 0.2 | 0.87 (0.83–0.91) |
|  | Emori, Prior MI (+) 2018 | 77 (68–81) | 94 (85–98) | 62 (53–65) | 69 (62–72) | 92 (79–98) | 2.5 (1.8–2.8) | 0.1 (0.0–0.3) | 0.90 (0.81–0.95) |
|  | Emori, Prior MI (–) 2018 | 87 (78–89) | 98 (90–99) | 73 (63–75) | 82 (76–84) | 96 (84–99) | 3.6 (2.5–4.0) | 0.0 (0.0–0.2) | 0.97 (0.93–0.99) |
|  | Erbay, G1 2019 | 91.1 (87.1–94.2) | 73.9 (61.5–84.0) | 96.6 (93.1–98.6) | 87.3 (76.6–93.5) | 92.1 (88.6–94.6) | 21.6 (10.9–45.4) | 0.27 (0.2–0.4) | 0.98 (0.96–0.99) |
|  | Erbay, G2 2019 | 92.7 (88.7–95.6) | 68.6 (50.7–83.2) | 96.7 (93.3–98.7) | 77.4 (61.5–88.0) | 94.9 (91.9–96.8) | 20.7 (9.7–44.3) | 0.3 (0.2–0.5) | 0.97 (0.94–0.99) |
|  | Santos 2022 | 84.0 (75.6–92.4) | 67.9 (47.6–84.1) | 93.6 (82.5–98.7) | 86.4 (65.2–95.5) | 83.0 (70.4–90.9) | 10.29 (1.97–28.4) | 0.34 (0.23–0.53) | 0.85 (0.75–0.92) |
|  | Wienemann 2022 | 83 (80.0–86.1) | 60 (52.4–66.7) | 94 (91.0–95.8) | 80 (72.8–86.5) | 84 (80.5–87.2) | 9.27 (6.36–13.52) | 0.43 (0.36–0.51) | 0.891 (0.865–0.918) |
|  | Echavarría‑Pinto 2022 | 82.2 | 83.3 | 80.6 | 75.00 | 88.00 | 4.50 | 0.20 | 0.90 (0.86–0.97) |
|  | Diemen 2023 | 84 (79–88) | 68 (56–78) | 88 (84–92) | 61 (50–71) | 91 (87–94) | 5.75 | 0.36 | – |
|  | Xiao 2024 | 76.83 | 59 | 89.04 | 78.67 | 76.02 | 5.38 | 0.46 | 0.821 (0.766-0.875) |
| **Mode=cQFR** | |  |  |  |  |  |  |  |  |
|  | Tu 2016 | 86 (78–93) | 74 (54–89) | 91 (81–97) | 80 (59–93) | 88 (77–95) | 8.4 (3.6–20.1) | 0.3 (0.1–0.5) | 0.92 (0.85–0.97) |
|  | Xu 2017 | 92.7 (89.3–95.3) | 94.6 (88.7–98.0) | 91.7 (87.1–95.0) | 85.5 (78.0–91.2) | 97.1 (93.7–98.9) | 11.4 (7.1–17.0) | 0.06 (0.03–0.13) | 0.96 (0.94–0.98) |
|  | Yazaki 2017 | 88.7 | 89.1 | 88.6 | 77.4 | 94.9 | 7.80 | 0.12 | 0.93 |
|  | Rosendaelc 2017 | 86.67 | 100.00 | 84.62 | 50.00 | 100.00 | 6.50 | 0.00 | – |
|  | Emori 2018 | 94 (88–97) | 97 (92–99) | 87 (77–92) | 94 (90–96) | 93 (82–98) | 7.5 (4.0–11.7) | 0.0 (0.0–0.1) | – |
|  | Stähli 2018 | 93.4 (90.9–95.4) | 75.0 (65.3–83.1) | 97.8 (95.9–99.0) | 89.3 (81.2–94.1) | 94.2 (92.1–95.8) | 34.7 (18.0–66.8) | 0.26 (0.18–0.36) | 0.86 (0.83–0.89) |
|  | Spitaleri 2018 | 94 | 88 | 97 | 94 | 94 | 28.88 | 0.13 | 0.96 (0.89–0.99) |
|  | Kołtowski 2018 | 85.4 (78.7–89.5) | 83.8 | 86.6 | 82.2 | 87.9 | 6.3 | 0.2 | 0.94 (0.91–0.97) |
|  | Westra, T 2018 | 83 | 77 (66–85) | 86 (79–91) | 75 (65–84) | 87 (80–92) | 5.4 (3.6–8) | 0.27 (0.18–0.4) | 0.86 (0.81–0.91) |
|  | Mejía-Rentería 2018 | 88 | 89 (83–94) | 87 (80–91) | 85 (79–89) | 91 (86–94) | 6.6 (4.5–9.8) | 0.1 (0.1–0.2) | 0.93 (0.90–0.96) |
|  | Westra, A 2018 | 86.8 | 86.5 (78.4–92.4) | 86.9 (81.6–91.1) | 76.3 (67.6–83.6) | 93.0 (88.5–96.1) | 6.58 (4.62–9.37) | 0.16 (0.09–0.25) | 0.92 (0.89–0.96) |
|  | Emori, Prior MI (+) 2018 | 87 (77–92) | 92 (82–97) | 82 (73–87) | 83 (74–87) | 91 (82–97) | 5.1 (3.0–7.3) | 0.1 (0.0–0.2) | 0.93 (0.86–0.97) |
|  | Emori, Prior MI (–) 2018 | 92 (84–96) | 95 (88–99) | 88 (79–92) | 91 (84–94) | 94 (84–98) | 7.9 (4.1–12.4) | 0.1 (0.0–0.2) | 0.97 (0.93– 0.99) |
|  | Tanigaki 2019 | 85 (81–89) | 90 (85–94) | 82 (77–85) | 81 (76–84) | 90 (85–94) | 4.9 (3.7–6.2) | 0.1 (0.1–0.2) | 0.93 |
|  | Erbay, G1 2019 | 94.1 (90.6–96.6) | 80.0 (68.2–88.9) | 98.5(95.8–99.7) | 94.6 (84.9–98.2) | 94.0 (90.5–96.2) | 54.7 (17.7–169.2) | 0.2 (0.1–0.3) | 0.98 (0.96–0.99) |
|  | Erbay, G2 2019 | 92.7 (88.7–95.6) | 65.7 (47.8–80.9) | 97.2 (93.9–99.0) | 79.3 (62.7–89.7) | 94.5 (91.5–96.4) | 23.1 (10.1–52.7) | 0.35 (0.2–0.6) | 0.97 (0.94–0.99) |
|  | Kleczyński 2019 | 95.1 | 91.8 | 97.3 | 95.74 | 94.74 | 33.98 | 0.08 | 0.98 (0.94–1.00) |
|  | Smit, DM (+) 2019 | 88 (79–94) | 71 (49–87) | 95 (86–99) | 85 (65–95) | 89 (81–94) | 13.69 | 0.31 | 0.91 (0.84–0.99) |
|  | Smit, DM (–) 2019 | 85 (79–89) | 69 (56–79) | 91 (85–95) | 74 (64–83) | 88 (84–91) | 7.83 | 0.34 | 0.93 (0.89–0.96) |
|  | Kanno 2020 | 78.6 | 85.3 | 72.6 | 73.6 | 84.6 | 3.11 | 0.20 | 0.84 (0.81–0.88) |
|  | Mehta 2020 | 93 | 86 | 95 | 86 | 95 | 18.29 | 0.15 | – |
|  | Tebaldi 2020 | 88 | 72 | 94 | 82 | 90 | 11.80 | 0.30 | 0.964 (0.903–0.974) |
|  | Diemen 2020 | 88 (84–92) | 70 (57–81) | 93 (89–96) | 73 (62–82) | 92 (89–94) | 9.91 | 0.32 | 0.94 (0.91–0.97) |
|  | Gutiérrez-Chico 2020 | 90 (83–97) | 91 (72–99) | 89 (77–97) | 81 (61–93) | 96 (85–99) | 8.6 (3.7–19.8) | 0.1 (0.0–0.4) | 0.91 |
|  | Kirigaya 2021 | 85.20 | 80.40 | 91.00 | 91.10 | 80.00 | 8.84 | 0.22 | – |
|  | Kleczynski 2021 | 94.2 (91.5–96.3) | 100.0 (96.6–100.0) | 92.2 (88.6–94.9) | 81.8 (75.4–86.9) | 100 | 12.83 | 0.00 | – |
|  | Diemen 2021 | 94 (88–97) | 100 (97–100) | 27 (6–61) | 94 (91–95) | 100 | 1.38 | 0.00 | – |
|  | Xu 2022 | 81.3 (71.3–91.2) | 75.0 (62.3–92.3) | 84.4 (73.0–95.2) | 70.6 (62.3–96.6) | 87.1 (75.2–94.7) | 4.808 | 0.208 | 0.862 (0.824–0.931) |
|  | Zasada 2022 | 61.54 | 40.00 | 75.00 | 50.00 | 66.67 | 1.60 | 0.80 | – |
|  | Dowling 2022 | 84 | 73 | 91 | 84 | 84 | 8.48 | 0.30 | 0.92 (0.84–1.00) |
|  | Kawashima 2022 | 88.27 | 90.10 | 78.67 | 95.69 | 60.20 | 4.22 | 0.13 | – |
|  | Wienemann 2022 | 91 (88.2–92.9) | 82 (75.5–86.9) | 95 (92.2–96.6) | 87 (81.3–91.7) | 92 (89.3–94.5) | 15.45 (10.3–23.1) | 0.19 (0.14–0.26) | 0.938 (0.917–0.961) |
|  | Echavarría‑Pinto 2022 | 83.3 | 85.2 | 80.6 | 75.61 | 89.80 | 4.65 | 0.17 | 0.92 (0.86–0.97) |
|  | Diemen 2023 | 84 (80–88) | 72 (61–81) | 87 (83–91) | 61 (50–71) | 92 (88–95) | 5.57 | 0.32 | – |
|  | Kasinadhuni 2023 | 92.80 | 87.50 | 95.00 | 87.50 | 95.00 | 17.50 | 0.13 | 0.97 (0.94–1.00) |
|  | Lopez-Palop 2023 | 90.7 (83.5–95.4) | 88.1 (75.0–94.8) | 92.3 (83.2–96.7) | 88.1 (77.1–99.1) | 92.3 (85.1–99.5) | 11.5 (4.9–26.8) | 0.13 (0.1–0.3) | 0.93 (0.88–0.98) |
|  | Xiao 2024 | 81.30 | 56.00 | 98.63 | 96.55 | 76.60 | 40.88 | 0.45 | 0.829 (0.773-0.885) |
|  | Yang 2024 | 90 (84–94) | 85 (74–92) | 95 (88–99) | 93 (84–97) | 88 (91–93) | 16.7 (6.4–43.7) | 0.16 (0.09–0.29) | 0.93 (0.87–0.96) |
|  | Winter 2024 | 83 (76–88) | 84 (70–92) | 82 (74–89) | 68 (55–79) | 92 (84–96) | 4.78 | 0.20 | 0.90 (0.84–0.95) |
| **Mode=aQFR** | |  |  |  |  |  |  |  |  |
|  | Tu 2016 | 87 (80-94) | 78 (58-91) | 91 (81-97) | 81 (61-93) | 90 (79-96) | 8.9 (3.7-21.0) | 0.2 (0.1-0.5) | 0.91 (0.83-0.96) |
|  | Rosendaelc 2017 | 86.67 | 50.00 | 92.31 | 50.00 | 92.31 | 6.50 | 0.54 | – |
| **Mode=uQFR** | |  |  |  |  |  |  |  |  |
|  | Tu 2021 | 93.0 (90.2–95.8) | 87.5 (80.2–92.8) | 96.2 (92.6–98.3) | 92.9 (86.5–96.9) | 93.1 (88.9–96.1) | 23.0 (11.6–45.5) | 0.13 (0.08–0.20) | 0.97 (0.95–0.99) |
|  | Guan 2022 | 96.7 (88.7–99.6) | 100.0 (92.0–100.0) | 88.2 (63.6–98.5) | 95.7 (85.7–98.8) | 100.0 (100–100.0) | 8.50 | 0.00 | – |
|  | Li 2022 | 93 (90–97) | 91 (83–97) | 95 (89–98) | 93 (84–97) | 94 (87–97) | 16.8 (7.7–36.6) | 0.09 (0.04–0.2) | 0.97 (0.93–0.99) |
|  | Fezzi 2023 | 93.4 (89.9–96.9) | 82.5 (67.2–92.7) | 96.8 (92.8–99.0) | 86.8 (71.9–95.6) | 95.6 (91.2–98.2) | 26.07(10.9–62.5) | 0.18 (0.09–0.4） | 0.930 (0.875–0.965) |
|  | Kotoku, Distal LM 2023 | 98.3 (96.2–99.5) | 81.2 (54.4–96.0) | 99.3 (97.5–99.9) | 86.7 (59.5–98.3) | 98.9 (97.0–99.8) | 115.38 (28.43–468.31) | 0.19 (0.07–0.52) | 0.95 (0.87–1.00) |
|  | Kotoku, pLAD 2023 | 95.3 (92.3–97.4) | 88.2 (76.1–95.6) | 96.8 (93.8–98.6) | 84.9 (72.4–93.3) | 97.6 (94.8–99.1) | 27.46 (13.79–54.70) | 0.12 (0.06–0.26) | 0.94 (0.89–0.99) |
|  | Kotoku, pLCX 2023 | 95.3 (92.3–97.4) | 84.8 (71.1–93.7) | 97.2 (94.4–98.9) | 84.8 (71.1–93.7) | 97.2 (94.4–98.9) | 30.76 (14.67–64.53) | 0.16 (0.08–0.31) | 0.94 (0.89–0.99) |
|  | Sun 2023 | 95.51 (91.34–98.04) | 85.45 (73.34–95.51) | 100.00 (97.05–100.00) | 100.00 | 93.89 (89.01–96.69) | – | 0.15 | 0.96 (0.93–0.99) |
|  | Zuo, J, Men 2023 | 83.3 (78.8–87.2) | 66.0 (56.0–75.1) | 91.2 (86.7–94.5) | 77.3 (68.6–84.1) | 85.5 (81.8–88.5) | 7.5 (4.8–11.6) | 0.4 (0.3–0.5) | – |
|  | Zuo, J, Women 2023 | 92.9 (87.9–96.3) | 74.1 (53.7–88.9) | 96.5 (91.9–98.8) | 80.0 (62.2–90.7) | 95.1 (91.1–97.4) | 20.9 (8.6–50.8) | 0.3 (0.1–0.5) | – |
|  | Zuo, X, n 2023 | 88 (85–91) | 70 (61–78) | 94 (91–96) | 77 (69–83) | 91 (89–93) | 11.66 | 0.32 | 0.91 (0.88–0.93) |
|  | Zuo, X, m 2023 | 80 (69–88) | 69 (52–84) | 90 (76–97) | 86 (71–94) | 76 (66–84) | 6.77 | 0.34 | 0.87 (0.78–0.94) |
|  | Yang 2023 | 94.06 (90.65–96.50) | 82.56 (72.87–89.90) | 99.00 (96.44–99.88) | 97.26 (89.91–99.30) | 92.96 (89.29–95.44) | 82.56 (20.72–328.95) | 0.18 (0.11–0.28) | 0.96 |
|  | Lai 2024 | 95.56 (89.01–98.78) | 90.91 (75.67–98.09) | 98.25 (90.61–99.96) | 96.77 (81.04–99.53) | 94.92 (86.38–98.21) | 51.82 (7.40–362.66) | 0.09 (0.03–0.27) | – |
|  | Yuta, pre-TAVR 2024 | 84.2 (68.7–93.4) | 61.6 (31.6–86.1) | 96.0 (79.6–99.9) | 88.9 (52.8–98.3) | 82.8 (70.6–90.6) | 15.38 | 0.40 | 0.91 (0.77–0.98) |
|  | Yuta, post-TAVR 2024 | 86.1 (70.5–93.7) | 66.7 (34.9–90.1) | 95.8 (78.9–99.9) | 88.9 (53.0–98.3) | 85.2 (72.0–92.8) | 17.31 | 0.32 | 0.93 (0.79–0.99) |
| **Mode=non-specified QFR** | |  |  |  |  |  |  |  |  |
|  | Xi 2021 | 83.6 (75.5–89.5) | 75.0 (61.7–84.9) | 91.4 (81.0–96.7) | 88.6 (75.6–95.5) | 80.3 (69.0–88.3) | 8.70 | 0.27 | 0.94 |
|  | Gan 2021 | 83.3 (72.2–92.6) | 85.7 (66.7–100.0) | 87.5 (75.0–96.9) | 81.8 (63.8–95.5) | 90.0 (80.0–100.0) | 6.856 | 0.163 | – |
|  | Peper 2021 | 85.6 | 84.6 | 96.3 | 83.1 | 87.6 | 6.19 | 0.18 | 0.89 |
|  | Zhang 2022 | 82.29 | 80.25 | 84.04 | 81.25 | 83.16 | 5.03 | 0.24 | 0.86 (0.80–0.91) |
|  | Liu 2023 | 81.01 | 77.78 | 83.70 | 79.87 | 81.91 | 4.77 | 0.27 | 0.823 (0.775–0.870) |
|  | Dong, DM, 2023 | 90 (84–94) | 70 (56–81) | 90 (81–95) | 81 (69–89) | 82 (75–87) | 6.7 (3.5–12.7) | 0.3 (0.2–0.5) | 0.90 (0.84–0.94) |
|  | Dong, Non-DM, 2023 | 92 (87–96) | 85 (74–92) | 89 (82–94) | 82 (73–89) | 91 (85–95) | 7.8 (4.8–13.4) | 0.2 (0.1–0.3) | 0.92 (0.87–0.96) |
|  | Yuasa 2023 | 79.4 | 85.4 | 69.6 | 85.4 | 64.0 | 2.83 | 0.20 | – |
|  | Zhang 2024 | 78.0 | 60.9 | 92.9 | 88.2 | 73.1 | 8.53 | 0.42 | – |
|  | Han 2024 | 92.2 (85.3–96.6) | 87.2 (74.3–95.2) | 96.4 (87.7–99.6) | 95.4 (84.0–98.8) | 90.0 (81.0–95.0) | 24.4 (6.2–95.7) | 0.13 (0.06–0.28) | 0.987 (0.842–0.999) |
|  | Yuta 2024 | 81.5 (65.7–92.3) | 69.2 (38.6–90.9) | 88.0 (68.8–97.5) | 75.0 (49.4–90.2) | 84.6 (70.6–92.6) | 5.77 | 0.35 | 0.91 (0.77–0.98) |
|  | Yuta 2024 | 81.5 (61.9–93.7) | 55.6 (21.2–86.3) | 94.4 (72.7–99.9) | 83.3 (40.5–97.3) | 81.0 (67.0–89.9) | 13.46 | 0.48 | 0.89 (0.71–0.98) |

Values are mean (95% confidence interval). PPV, positive predictive value; NPV, negative predictive value; LR+, positive likelihood ratio; LR−, negative likelihood ratio; AUC, area under the receiver operating characteristic curve. Other abbreviations are as in Supplement 1.

**Figure S1** Forest plots of LR+ and LR- of QFR.

**Figure S2** Forest plots of DOR of QFR.

**Figure S3** Quality assessment of the included studies.
